# Supplementary material
Source: publisher figshare collection journal article supplement (https://acs.figshare.com/ndownloader/files/4498795)
Supplement: Supplementary file 1 [file 4498795]

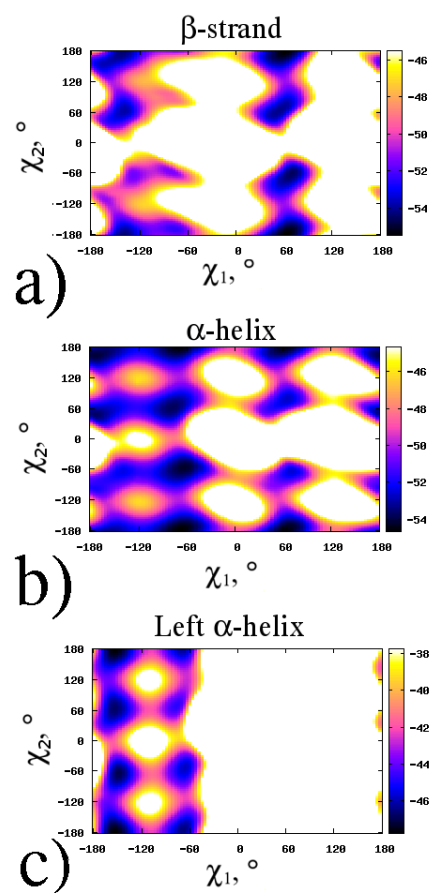

Supplementary File 12. DfpGly side chain rotamers potential energy  $E(\chi_1, \chi_2)$  in different backbone conformations. (a)  $\beta$ -strand. (b)  $\alpha$ -helix. (c) Left  $\alpha$ -helix.
